# Supplementary material
Source: PubMed Central journal article supplement (PMC4030759)
Supplement: NIHMS529273-supplement-A_R_supplement.pdf [file NIHMS529273-supplement-A_R_supplement.pdf]

Supplemental Table II:

| List of genes located in the IFN Cluster |           |         |           |                                                                                          |
|------------------------------------------|-----------|---------|-----------|------------------------------------------------------------------------------------------|
| RefSeq                                   | UniGene   | Gene ID | Gene      | Description                                                                              |
| NM_033109                                | Hs.388733 | 87178   | PNP1      | Polyribonucleotide nucleotidyltransferase 1                                              |
| NM_152703                                | Hs.489138 | 219285  | C7orf6    | Chromosome 7 open reading frame 6                                                        |
| NM_014506                                | Hs.252682 | 27348   | TOR1B     | Torsin family 1, member 8 (torsin B)                                                     |
| NM_005531                                | Hs.380250 | 3428    | IFI16     | Interferon, gamma-inducible protein 16                                                   |
| AK094968                                 | Hs.380250 | 3428    | IFI16     | Interferon, gamma-inducible protein 16                                                   |
| NM_004048                                | Hs.534255 | 567     | B2M       | Beta-2-microglobulin                                                                     |
| A_24_P290257                             |           |         |           |                                                                                          |
| NM_016410                                | Hs.415534 | 51510   | SNF7DC2   | SNF7 domain containing 2                                                                 |
| NM_003810                                | Hs.478275 | 8743    | TNFSF10   | Tumor necrosis factor (ligand) superfamily, member 10                                    |
| NM_031458                                | Hs.518200 | 83666   | PARP9     | Poly (ADP-ribose) polymerase family, member 9                                            |
| NM_022168                                | Hs.163173 | 64135   | IFIH1     | Interferon induced with helicase C domain 1                                              |
| NM_005533                                | Hs.50842  | 3430    | IFI35     | Interferon-induced protein 35                                                            |
| NM_198183                                | Hs.425777 | 9246    | UBE2L6    | Ubiquitin-conjugating enzyme E2L 6                                                       |
| NM_025534                                | Hs.524760 | 4938    | OAS1      | 2'-5'-oligoadenylate synthetase 1, 40J/46kDa                                             |
| NM_022750                                | Hs.12646  | 64761   | ZC3HDC1   | Zinc finger CCH type domain containing 1                                                 |
| NM_002463                                | Hs.926    | 4600    | MX2       | Myxovirus (influenza virus) resistance 2 (mouse)                                         |
| NM_003733                                | Hs.118633 | 8638    | OASL      | 2'-5'-oligoadenylate synthetase-like                                                     |
| NM_017523                                | Hs.441975 | 54739   | HSXIAPAF1 | XIAP associated factor-1                                                                 |
| NM_017523                                | Hs.441975 | 54739   | HSXIAPAF1 | XIAP associated factor-1                                                                 |
| NM_001013002                             |           |         |           |                                                                                          |
| NM_017631                                | Hs.481141 | 55601   | FLJ20035  | Hypothetical protein FLJ20035                                                            |
| NM_017523                                | Hs.441975 | 54739   | HSXIAPAF1 | XIAP associated factor-1                                                                 |
| NM_002759                                | Hs.131431 | 5610    | PRKR      | Protein kinase, interferon-inducible double stranded RNA dependent                       |
| NM_024119                                | Hs.55918  | 79132   | LGP2      | Likely ortholog of mouse D11lep2                                                         |
| NM_001111                                | Hs.12341  | 103     | ADAR      | Adenosine deaminase, RNA-specific                                                        |
| NM_002462                                | Hs.517307 | 4599    | MX1       | Myxovirus (influenza virus) resistance 1, interferon-inducible protein p78 (mouse)       |
| NM_001547                                | Hs.437609 | 3433    | IFI2      | Interferon-induced protein with tetratricopeptide repeats 2                              |
| NM_015535                                | Hs.120323 | 26010   | DNAPT96   | DNA polymerase-transactivated protein 6                                                  |
| NM_022873                                | Hs.523847 | 2537    | G1P3      | Interferon, alpha-inducible protein (clone IFI-6-16)                                     |
| NM_006417                                | Hs.82316  | 10561   | IFI44     | Interferon-induced protein 44                                                            |
| NM_005101                                | Hs.458485 | 9636    | G1P2      | Interferon, alpha-inducible protein (clone IFI-15K)                                      |
| NM_001548                                | Hs.20315  | 3434    | IFI1      | Interferon-induced protein with tetratricopeptide repeats 1                              |
| NM_002463                                | Hs.926    | 4600    | MX2       | Myxovirus (influenza virus) resistance 2 (mouse)                                         |
| NM_006820                                | Hs.389724 | 10964   | IFI44L    | Interferon-induced protein 44                                                            |
| NM_006187                                | Hs.528634 | 4940    | OAS3      | 2'-5'-oligoadenylate synthetase 3, 100kDa                                                |
| NM_017414                                | Hs.38260  | 11274   | USP18     | Ubiquitin specific protease 18                                                           |
| NM_005532                                | Hs.532634 | 3429    | IFI27     | Interferon, alpha-inducible protein 27                                                   |
| NM_005532                                | Hs.532634 | 3429    | IFI27     | Interferon, alpha-inducible protein 27                                                   |
| NM_002982                                | Hs.303049 | 6347    | CCL2      | Chemokine (C-C motif) ligand 2                                                           |
| NM_194248                                | Hs.91608  | 9381    | OTOF      | Otofelin                                                                                 |
| NM_021034                                | Hs.374650 | 10410   | IFITM3    | Interferon induced transmembrane protein 3 (1-8U)                                        |
| ENST00000270031                          |           |         |           |                                                                                          |
| NR_001590                                |           |         |           |                                                                                          |
| A_24_P7040                               |           |         |           |                                                                                          |
| NM_006435                                |           |         |           |                                                                                          |
| A_24_P15502                              | Hs.174195 | 10581   | IFITM2    | Interferon induced transmembrane protein 2 (1-8D)                                        |
| A_24_P868905                             |           |         |           |                                                                                          |
| ENST00000339867                          |           |         |           |                                                                                          |
| NM_002346                                | Hs.521903 | 4061    | LY6E      | Lymphocyte antigen 6 complex, locus E                                                    |
| NM_004031                                | Hs.166120 | 3665    | IRF7      | Interferon regulatory factor 7                                                           |
| NM_145641                                | Hs.474737 | 80833   | APOL3     | Apolipoprotein L 3                                                                       |
| NM_002900                                | Hs.381081 | 5698    | PSM09     | Proteinase (prosome, macropain) subunit, beta type, 9 (large multifunctional protease 2) |
| NM_000593                                | Hs.352018 | 6890    | TAP1      | Transporter 1, ATP-binding cassette, sub-family B (MDR/TAP)                              |
| NM_007315                                | Hs.470943 | 6772    | STAT1     | Signal transducer and activator of transcription 1, 91kDa                                |
| NM_139266                                | Hs.470943 | 6772    | STAT1     | Signal transducer and activator of transcription 1, 91kDa                                |
| NM_006084                                | Hs.1706   | 10379   | ISGF3G    | Interferon-stimulated transcription factor 3, gamma 48kDa                                |
| NM_002053                                | Hs.62661  | 2633    | GBP1      | Guanylate binding protein 1, interferon-inducible, 67kDa                                 |
| NM_002053                                | Hs.62661  | 2633    | GBP1      | Guanylate binding protein 1, interferon-inducible, 67kDa                                 |
| NM_003592                                | Hs.146806 | 8454    | CUL1      | Cullin 1                                                                                 |
| NM_003592                                | Hs.146806 | 8454    | CUL1      | Cullin 1                                                                                 |

List of genes located in the Biomarker Cluster

| RefSeq          | UniGene   | Gene ID | Gene                              | Description                                                                               |
|-----------------|-----------|---------|-----------------------------------|-------------------------------------------------------------------------------------------|
|                 |           |         | D14641                            |                                                                                           |
| NM_018428       | Hs.211828 | 55813   | HCA66                             | Hepatocellular carcinoma-associated antigen 66                                            |
| CR616528        | Hs.520210 | 11014   | KDEL2                             | KDEL (Lys-Alu-Glu-Leu) endoplasmic reticulum protein retention receptor 2                 |
| NM_012453       | Hs.52515  | 26608   | TBL2                              | Transducin (beta)-like 2                                                                  |
| NM_003336       | Hs.379466 | 7319    | UBE2A                             | Ubiquitin-conjugating enzyme E2A (RAD6 homolog)                                           |
| NM_016131       | Hs.467960 | 10890   | RAB10                             | RAB10, member RAS oncogene family                                                         |
| NM_018472       | Hs.434337 | 55855   | FAM45B                            | Family with sequence similarity 45, member B                                              |
| NM_001013711    |           |         |                                   |                                                                                           |
| NM_015132       | Hs.487648 | 23161   | SNX13                             | Sorting nexin 13                                                                          |
| NM_014184       | Hs.445890 | 29097   | HSPC163                           | HSPC163 protein                                                                           |
| NM_020189       | Hs.492555 | 56943   | eIy2                              | EIy2 protein                                                                              |
| NM_012083       | Hs.140720 | 23401   | FRAT2                             | Frequently rearranged in advanced T-cell lymphomas 2                                      |
| NM_001065       | Hs.279594 | 7132    | TNFRSF1A                          | Tumor necrosis factor receptor superfamily, member 1A                                     |
| NM_017723       | Hs.95541  | 54883   | FLJ20045                          | Hypothetical protein FLJ20045                                                             |
| NM_004027       | Hs.500761 | 9123    | SLC16A3                           | Solute carrier family 16 (monocarboxylic acid transporters), member 3                     |
| NM_173647       | Hs.171802 | 284996  | RNF149                            | Ring finger protein 149                                                                   |
| NM_001946       | Hs.298654 | 1848    | DUSP6                             | Dual specificity phosphatase 6                                                            |
| NM_017966       |           |         |                                   |                                                                                           |
| NM_012479       | Hs.520974 | 7532    | YWHAG                             | Tyrosine 3-monooxygenase/tryptophan 5-monooxygenase activation protein, gamma polypeptide |
| NM_004048       | Hs.443031 | 2720    | GLB1                              | Galactosidase, beta 1                                                                     |
| AK026647        | Hs.98073  | 4167    | CDNA: FLJ22994 fs, clone KAT11918 |                                                                                           |
| NM_016951       | Hs.15159  | 51192   | CKLF                              | Chemokine-like factor                                                                     |
| NM_001295       | Hs.301921 | 1230    | CCR1                              | Chemokine (C-C motif) receptor 1                                                          |
| NM_032731       | Hs.408236 | 84817   | TXNL5                             | Thioredoxin-like 5                                                                        |
| NM_001537       | Hs.250899 | 3281    | HSPB1                             | Heat shock factor binding protein 1                                                       |
| NM_012459       | Hs.279915 | 26521   | TMM88                             | Translocase of inner mitochondrial membrane 8 homolog B (yeast)                           |
| NM_014066       | Hs.2076   | 28991   | COMMD5                            | COMMD domain containing 5                                                                 |
| NM_018206       | Hs.454528 | 55737   | VPS35                             | Vacuolar protein sorting 35 (yeast)                                                       |
| NM_144635       | Hs.436847 | 131408  | MGC21688                          | Hypothetical protein MGC21688                                                             |
| NM_001378       | Hs.546250 | 1781    | DNLC2                             | Dynein, cytoplasmic, intermediate polypeptide 2                                           |
| NM_058172       | Hs.162963 | 118429  | ANTXR2                            | Anthrax toxin receptor 2                                                                  |
| NM_002210       | Hs.436873 | 3685    | ITGAV                             | Integrin, alpha V (vitronectin receptor, alpha polypeptide, antigen CD51)                 |
| NM_006591       | Hs.82502  | 10714   | POLD3                             | Polymerase (DNA-directed), delta 3, accessory subunit                                     |
| NM_005717       | Hs.518609 | 10092   | ARPC5                             | Actin related protein 2/3 complex, subunit 5, 16kDa                                       |
| ENST00000376572 |           |         |                                   |                                                                                           |
| NM_005955       | Hs.471991 | 4520    | MTF1                              | Metal-regulatory transcription factor 1                                                   |
| NM_005767       | Hs.123464 | 10161   | P2RY5                             | Purinergic receptor P2Y, G-protein coupled, 5                                             |
| NM_018126       | Hs.31082  | 55161   | TMEM33                            | Transmembrane protein 33                                                                  |
| NM_024573       | Hs.15929  | 79624   | C6orf211                          | Chromosome 6 open reading frame 211                                                       |
| NM_032936       | Hs.19025  | 85025   | C7orf35                           | Chromosome 7 open reading frame 35                                                        |
| NM_006178       | Hs.431279 | 4905    | NSF                               | N-ethylmaleimide-sensitive factor                                                         |
| NM_004766       | Hs.75724  | 9276    | COPB2                             | Cotaster protein complex, subunit beta 2 (beta prime)                                     |
| NM_004035       | Hs.464137 | 51      | ACOX1                             | Acyl-Coenzyme A oxidase 1, palmitoyl                                                      |
| NM_015916       | Hs.241545 | 51063   | FAM268                            | Family with sequence similarity 26, member 8                                              |
| NM_00647        | Hs.513794 | 1231    | CCR2                              | Chemokine (C-C motif) receptor 2                                                          |
| NM_000647       | Hs.513794 | 1231    | CCR2                              | Chemokine (C-C motif) receptor 2                                                          |
| NM_007187       | Hs.411300 | 11193   | WBP4                              | WW domain binding protein 4 (formin binding protein 21)                                   |
| ENST00000295859 |           |         |                                   |                                                                                           |
| NM_016530       | Hs.389733 | 51762   | RAB8B                             | RAB8B, member RAS oncogene family                                                         |
| NM_001001481    | Hs.492031 | 55284   | FLJ11011                          | Hypothetical protein FLJ11011                                                             |
| NM_002643       | Hs.468415 | 5281    | PIGF                              | Phosphatidylinositol glycan, class F                                                      |
| NM_000859       | Hs.11899  | 3156    | HMGCR                             | 3-hydroxy 3-methylglutaryl-Coenzyme A reductase                                           |
| NM_032587       | Hs.200242 | 84674   | CARD6                             | Caspase recruitment domain family, member 6                                               |
| NM_020374       | Hs.302977 | 57102   | C12orf4                           | Chromosome 12 open reading frame 4                                                        |
| ENST00000380494 |           |         |                                   |                                                                                           |
| BX648945        | Hs.185774 | 2140    | EYA3                              | Eyes absent homolog 3 (Drosophila)                                                        |
| NM_005923       | Hs.186486 | 4217    | MAP3K5                            | Mitogen-activated protein kinase kinase kinase 5                                          |
| NM_152720       | Hs.462929 | 91607   | FLJ34922                          | Hypothetical protein FLJ34922                                                             |
| NM_014740       | Hs.389649 | 9775    | DDX48                             | DEAD (Asp-Glu-Ala-Asp) box polypeptide 48                                                 |
| CR603184        | Hs.469944 | 55041   | PLEKH82                           | Pleckstrin homology domain containing, family B (evectins) member 2                       |
| NM_024945       | Hs.284137 | 80010   | C9orf76                           | Chromosome 9 open reading frame 76                                                        |
| NM_018261       | Hs.269665 | 55763   | SEC3L1                            | SEC3-like 1 (S. cerevisiae)                                                               |

|                 |           |        |                                         |                                                                                                           |
|-----------------|-----------|--------|-----------------------------------------|-----------------------------------------------------------------------------------------------------------|
| NM_022457       | Hs.523744 | 64326  | COP1                                    | Constitutive photomorphogenic protein                                                                     |
| NM_001695       | Hs.86905  | 528    | ATP6V1C1                                | ATPase, H+ transporting, lysosomal 42kDa, V1 subunit C, isoform 1                                         |
| NM_004161       | Hs.310645 | 5861   | RAB1A                                   | RAB1A, member RAS oncogene family                                                                         |
| NM_213651       | Hs.132553 | 29957  | SLC25A24                                | Solute carrier family 25 (mitochondrial carrier; phosphate carrier), member 24                            |
| NM_01025595     |           |        |                                         |                                                                                                           |
| NM_015130       |           |        |                                         |                                                                                                           |
| NM_022776       | Hs.477440 | 114885 | OSBP1L1                                 | Oxysterol binding protein-like 11                                                                         |
| NM_018184       | Hs.250009 | 55207  | ARL10C                                  | ADP-ribosylation factor-like 10C                                                                          |
| NM_000081       | Hs.532411 | 1130   | CHS1                                    | Chediak-Higashi syndrome 1                                                                                |
| NM_001315       | Hs.485233 | 1432   | MAPK14                                  | Mitogen-activated protein kinase 14                                                                       |
| BC014894        | Hs.348514 |        | CDNA FLJ22412 fic, clone SKMUS2000690   |                                                                                                           |
| NM_004859       | Hs.491351 | 1213   | CLTC                                    | Clathrin, heavy polypeptide (Hc)                                                                          |
| NM_004504       | Hs.443507 | 3267   | HRB                                     | HIV-1 Rev binding protein                                                                                 |
| NM_201612       | Hs.252543 | 121457 | IKIP                                    | IKK interacting protein                                                                                   |
| NM_022457       | Hs.523744 | 64326  | COP1                                    | Constitutive photomorphogenic protein                                                                     |
| NM_018206       | Hs.45428  | 55737  | VPS35                                   | Vacuolar protein sorting 35 (yeast)                                                                       |
| NM_001017534    |           |        |                                         |                                                                                                           |
| NM_153638       | Hs.516859 | 80025  | PANK2                                   | Pantothenate kinase 2 (Hallervorden-Spatz syndrome)                                                       |
| NM_018475       | Hs.479766 | 55858  | TPARL                                   | TPA regulated locus                                                                                       |
| NM_018475       | Hs.479766 | 55858  | TPARL                                   | TPA regulated locus                                                                                       |
| NM_207332       | Hs.128130 | 157697 | LOC157697                               | Hypothetical protein LOC157697                                                                            |
| NM_001693       | Hs.295917 | 526    | ATP6V1B2                                | ATPase, H+ transporting, lysosomal 56/58kDa, V1 subunit B, isoform 2                                      |
| NM_000895       | Hs.524648 | 4048   | LT44H                                   | Leukotriene A4 hydrolase                                                                                  |
| NM_032986       | Hs.369373 | 10483  | SEC23B                                  | Sec23 homolog B (S. cerevisiae)                                                                           |
| NM_004253       | Hs.27182  | 9373   | PLAA                                    | Phospholipase A2-activating protein                                                                       |
| NM_153261       | Hs.59134  | 255919 | FLJ38101                                | Hypothetical protein FLJ38101                                                                             |
| NM_014112       | Hs.253594 | 7227   | TRPS1                                   | Trichorhinophalangeal syndrome 1                                                                          |
| NM_001001664    | Hs.332297 | 339745 | LOC339745                               | Hypothetical protein LOC339745                                                                            |
| NM_024610       | Hs.29169  | 79663  | HSPBAP1                                 | HSPB (heat shock 27kDa) associated protein 1                                                              |
| NM_003626       | Hs.530749 | 8500   | PPF1A1                                  | Protein tyrosine phosphatase, receptor type, f polypeptide (PTPRF), interacting protein (liprin), alpha 1 |
| NM_177424       | Hs.523855 | 23673  | STX12                                   | Syntaxin 12                                                                                               |
| NM_173514       | Hs.128696 | 153129 | FLJ90709                                | Hypothetical protein FLJ90709                                                                             |
| NM_004736       | Hs.227656 | 9213   | XPR1                                    | Xenotropic and polytropic retrovirus receptor                                                             |
| NM_016733       | Hs.474596 | 3985   | LIMK2                                   | LIM domain kinase 2                                                                                       |
| NM_007126       | Hs.529782 | 7415   | VCP                                     | Valosin-containing protein                                                                                |
| NM_014811       | Hs.533260 | 9859   | KIAA0649                                | KIAA0649                                                                                                  |
| NM_025187       | Hs.513666 | 80262  | Lin10                                   | Lin-10 protein homolog                                                                                    |
| NM_006459       | Hs.150087 | 10613  | SPFH1                                   | SPFH domain family, member 1                                                                              |
| NM_152557       | Hs.24643  | 155061 | FLJ31413                                | Hypothetical protein FLJ31413                                                                             |
| NM_003842       | Hs.521456 | 8795   | TNFRSF10B                               | Tumor necrosis factor receptor superfamily, member 10b                                                    |
| NM_001747       | Hs.516155 | 822    | CAPG                                    | Capping protein (actin filament), gelsolin-like                                                           |
| THC238310       |           |        |                                         |                                                                                                           |
| BC024020        | Hs.444569 | 81671  | VMP1                                    | Likely ortholog of rat vacuole membrane protein 1                                                         |
| ENST00000299502 |           |        |                                         |                                                                                                           |
| NM_020132       | Hs.248785 | 56894  | AGPAT3                                  | 1-acylglycerol-3-phosphate O-acyltransferase 3                                                            |
| NM_020803       | Hs.546415 | 57563  | KLHL8                                   | Kelch-like 8 (Drosophila)                                                                                 |
| NM_004872       | Hs.523252 | 9528   | Clorf8                                  | Chromosome 1 open reading frame 8                                                                         |
| NM_001862       | Hs.1342   | 1329   | COX5B                                   | Cytochrome c oxidase subunit Vb                                                                           |
| NM_001660       | Hs.148330 | 378    | ARF4                                    | ADP-ribosylation factor 4                                                                                 |
| W31297          |           |        |                                         |                                                                                                           |
| NM_138795       | Hs.497399 | 127829 | ARL10B                                  | ADP-ribosylation factor-like 10B                                                                          |
| NM_000100       | Hs.695    | 1476   | CSTB                                    | Cystatin B (steffin B)                                                                                    |
| NM_002298       | Hs.381099 | 3936   | LCP1                                    | Lymphocyte cytosolic protein 1 (L-plastin)                                                                |
| NM_021960       | Hs.532826 | 4170   | NCL1                                    | Nucleolar leukemia sequence 1 (BCL2-related)                                                              |
| NM_021009       | Hs.520348 | 7316   | UBC                                     | Ubiquitin C                                                                                               |
| NM_021009       | Hs.520348 | 7316   | UBC                                     | Ubiquitin C                                                                                               |
| NM_032525       | Hs.193491 | 84617  | TUBB6                                   | Tubulin, beta 6                                                                                           |
| NM_001020818    |           |        |                                         |                                                                                                           |
| NM_002096       | Hs.143873 | 6281   | S100A10                                 | S100 calcium binding protein A10 (annexin II ligand, calpactin I, light polypeptide (p11))                |
| NM_000700       | Hs.494173 | 301    | ANXA1                                   | Annexin A1                                                                                                |
| NM_001750       | Hs.440061 | 831    | CAST                                    | Calpastatin                                                                                               |
| NM_003927       | Hs.25674  | 8932   | MBD2                                    | Methyl-CpG binding domain protein 2                                                                       |
| NM_003404       | Hs.279920 | 7529   | YWHA8                                   | Tyrosine 3-monooxygenase/tryptophan 5-monooxygenase activation protein, beta polypeptide                  |
| NM_144601       | Hs.298198 | 123920 | CKLFSF3                                 | Chemokine-like factor super family 3                                                                      |
| NM_004373       | Hs.497118 | 1337   | COX6A1                                  | Cytochrome c oxidase subunit VIa polypeptide 1                                                            |
| NM_012199       | Hs.22867  | 25523  | EIF2C1                                  | Eukaryotic translation initiation factor 2C, 1                                                            |
| NM_020338       | Hs.193118 | 57178  | RAI17                                   | Retinoic acid induced 17                                                                                  |
| NM_003971       | Hs.463439 | 9043   | SPAG9                                   | Sperm associated antigen 9                                                                                |
| AK127910        | Hs.483873 | 2760   | GM2A                                    | GM2 ganglioside activator                                                                                 |
| NM_000147       | Hs.370858 | 2517   | FUCA1                                   | Fucosidase, alpha-L-1, tissue                                                                             |
| NM_018268       | Hs.482573 | 55255  | WDR41                                   | WD repeat domain 41                                                                                       |
| NM_19430749     | Hs.209614 | 83742  | XRCCA4                                  | X-ray repair complementing defective repair in Chinese hamster cells 4                                    |
| NM_001145       | Hs.283749 | 6038   | RNASE4                                  | Angiogenin, ribonuclease, RNase A family 5                                                                |
| NM_000917       | Hs.500047 | 5033   | P4HA1                                   | Angiogenin, ribonuclease, RNase A family 5                                                                |
| NM_004595       | Hs.529887 | 6611   | SMS                                     | Procollagen-proline, 2-oxoglutarate 4-dioxygenase (proline 4-hydroxylase), alpha polypeptide I            |
| NM_018405       | Hs.462729 | 55352  | HSA272196                               | Spermine synthase                                                                                         |
| NM_022550       | Hs.171190 | 7518   | XRCCA4                                  | Hypothetical protein, clone 2746033                                                                       |
| NM_025080       | Hs.335326 | 80150  | ASPNL1                                  | X-ray repair complementing defective repair in Chinese hamster cells 4                                    |
| NM_001560       | Hs.496646 | 3597   | IL13RA1                                 | Asparaginase like 1                                                                                       |
| NM_001560       | Hs.496646 | 3597   | IL13RA1                                 | Interleukin 13 receptor, alpha 1                                                                          |
| NM_003916       | Hs.121592 | 8905   | AP1S2                                   | Adaptor-related protein complex 1, sigma 2 subunit                                                        |
| NM_003916       | Hs.121592 | 8905   | AP1S2                                   | Adaptor-related protein complex 1, sigma 2 subunit                                                        |
| NM_004595       | Hs.529887 | 6611   | SMS                                     | Spermine synthase                                                                                         |
| NM_031484       | Hs.209614 | 83742  | MARVELD1                                | Hypothetical protein, clone 2746033                                                                       |
| NM_000852       | Hs.523836 | 2950   | GSTP1                                   | Glutathione S-transferase pi                                                                              |
| NM_000181       | Hs.255230 | 2990   | GUSB                                    | Glucuronidase, beta                                                                                       |
| NM_014300       | Hs.9534   | 23478  | SPC18                                   | Signal peptidase complex (18kD)                                                                           |
| NM_017801       | Hs.380627 | 54918  | CKLFSF6                                 | Chemokine-like factor super family 6                                                                      |
| NM_022485       | Hs.475382 | 64419  | FLJ22405                                | Hypothetical protein FLJ22405                                                                             |
| NM_007236       | Hs.406234 | 11261  | CHP                                     | Calcium binding protein P22                                                                               |
| NM_015987       | Hs.294133 | 50865  | HEBP1                                   | Heme binding protein 1                                                                                    |
| NM_000610       | Hs.502328 | 960    | CD44                                    | CD44 antigen (homing function and Indian blood group system)                                              |
| NM_199418       | Hs.523936 | 5547   | PRCP                                    | Prolylcarboxypeptidase (angiotensinase C)                                                                 |
| NM_018434       | Hs.484363 | 55819  | RNF130                                  | Ring finger protein 130                                                                                   |
| NM_003100       | Hs.134822 | 6643   | SNX2                                    | Sorting nexin 2                                                                                           |
| NM_000507       | Hs.494496 | 2203   | FBP1                                    | Fructose-1,6-bisphosphatase 1                                                                             |
| NM_017801       | Hs.380627 | 54918  | CKLFSF6                                 | Chemokine-like factor super family 6                                                                      |
| NM_001002233    | Hs.191179 | 80223  | RAB11FIP1                               | RAB11 family interacting protein 1 (class I)                                                              |
| NM_021255       | Hs.105103 | 57161  | PEL1                                    | Pellino homolog 2 (Drosophila)                                                                            |
| NM_017849       | Hs.355708 | 55654  | FLJ20507                                | Hypothetical protein FLJ20507                                                                             |
| NM_183376       | Hs.6093   | 91947  | ARRDC4                                  | Arrestin domain containing 4                                                                              |
| NM_152904       | Hs.431045 | 92521  | HCMOGT-1                                | Sperm antigen HCMOGT-1                                                                                    |
| BC013142        | Hs.445239 |        | Homo sapiens, clone IMAGE:5019307, mRNA |                                                                                                           |
| NM_002826       | Hs.518374 | 5768   | QSOX1                                   | Quiescinq Q6                                                                                              |
| NM_004385       | Hs.443681 | 1462   | CSPG2                                   | Chondroitin sulfate proteoglycan 2 (versican)                                                             |
| NM_003078       | Hs.444445 | 6604   | SMARCD3                                 | SWI/SNF related, matrix associated, actin dependent regulator of chromatin, subfamily d, member 3         |
| NM_003255       | Hs.104839 | 7077   | TIMP2                                   | Tissue inhibitor of metalloproteinase 2                                                                   |
| NM_080792       | Hs.128846 | 140885 | PTPNS1                                  | Protein tyrosine phosphatase, non-receptor type substrate 1                                               |
| NM_021626       | Hs.514850 | 59342  | SCPEP1                                  | Serine carboxypeptidase 1                                                                                 |
| NM_024829       | Hs.131333 | 79887  | FLJ22662                                | Hypothetical protein FLJ22662                                                                             |
| NM_001995       | Hs.406678 | 2180   | ACSL1                                   | Acyl-CoA synthetase long-chain family member 1                                                            |
| NM_003494       | Hs.252180 | 8291   | DYSF                                    | Dysferlin, limb girdle muscular dystrophy 28 (autosomal recessive)                                        |
| NM_007282       | Hs.12333  | 11342  | RNF13                                   | Ring finger protein 13                                                                                    |
| NM_000397       | Hs.292356 | 1536   | CYBB                                    | Cytochrome b-245, beta polypeptide (chronic granulomatous disease)                                        |
| NM_006573       | Hs.525157 | 10673  | TNFSF13B                                | Tumor necrosis factor (ligand) superfamily, member 13b                                                    |
| NM_144669       | Hs.123681 | 144423 | FLJ31978                                | Hypothetical protein FLJ31978                                                                             |
| NM_032048       | Hs.532815 | 84034  | EMILIN2                                 | Elastin microfibril interfacer 2                                                                          |
| ENST00000223618 |           |        |                                         |                                                                                                           |

|                 |           |        |            |                                                                                 |
|-----------------|-----------|--------|------------|---------------------------------------------------------------------------------|
| NM_000174       | Hs.1144   | 2815   | GP9        | Glycoprotein IX (platelet)                                                      |
| NM_002863       | Hs.282417 | 5836   | PYGL       | Phosphorylase, glycogen; liver (Hers disease, glycogen storage disease type VI) |
| NM_001064       | Hs.89643  | 7086   | TKT        | Transketolase (Wernicke-Korsakoff syndrome)                                     |
| NM_004781       | Hs.66708  | 9341   | VAMP3      | Vesicle-associated membrane protein 3 (cellubrevin)                             |
| NM_000690       | Hs.436437 | 217    | ALDH2      | Aldehyde dehydrogenase 2 family (mitochondrial)                                 |
| NM_000690       | Hs.436437 | 217    | ALDH2      | Aldehyde dehydrogenase 2 family (mitochondrial)                                 |
| NM_006317       | Hs.201641 | 10409  | BASP1      | Brain abundant, membrane attached signal protein 1                              |
| NM_012413       | Hs.79033  | 25797  | QPCT       | Glutaminy-peptide cyclotransferase (glutaminy cyclase)                          |
| NM_012413       | Hs.79033  | 25797  | QPCT       | Glutaminy-peptide cyclotransferase (glutaminy cyclase)                          |
| NM_133491       | Hs.10846  | 112483 | SMT2       | Spermidine/spermine N1-acetyltransferase 2                                      |
| NM_016630       | Hs.242458 | 51324  | SPG21      | Sjogren paraprotein 21 (autosomal recessive, Mast syndrome)                     |
| NM_004846       | Hs.292026 | 9470   | EIF4E2     | Eukaryotic translation initiation factor 4E member 2                            |
| NM_006432       | Hs.433222 | 10577  | NPC2       | Niemann-Pick disease, type C2                                                   |
| NM_001671       | Hs.12056  | 432    | ASGR1      | Asialoglycoprotein receptor 1                                                   |
| NM_006291       | Hs.525607 | 7127   | TNFAIP2    | Tumor necrosis factor, alpha-induced protein 2                                  |
| NM_006332       | Hs.14623  | 10437  | IFI30      | Interferon, gamma-inducible protein 30                                          |
| NM_002337       | Hs.533136 | 4043   | LRPAP1     | Low density lipoprotein receptor-related protein associated protein 1           |
| NM_015379       | Hs.410497 | 25798  | BRI3       | Brain protein I3                                                                |
| NM_024075       | Hs.15580  | 79042  | LENG5      | Leukocyte receptor cluster (LRC) member 5                                       |
| NM_015264       |           |        |            |                                                                                 |
| NM_004847       | Hs.76364  | 199    | AIF1       | Allograft inflammatory factor 1                                                 |
| NM_002939       | Hs.530687 | 6050   | RNH        | Ribonuclease/angiogenin inhibitor                                               |
| NM_001542       | Hs.370247 | 334    | APLP2      | Amyloid beta (A4) precursor-like protein 2                                      |
| NM_002087       | Hs.514220 | 2896   | GRN        | Granulin                                                                        |
| NM_030938       | Hs.444569 | 81671  | VMP1       | Likely ortholog of rat vacuole membrane protein 1                               |
| NM_020179       | Hs.438064 | 56935  | FNS        | FNS protein                                                                     |
| NM_014624       | Hs.275243 | 6277   | S100A6     | S100 calcium binding protein A6 (calyclin)                                      |
| NM_005574       | Hs.34560  | 4005   | LMO2       | LIM domain only 2 (rhombotin-like 1)                                            |
| NM_001154       | Hs.480653 | 308    | ANXA5      | Annexin A5                                                                      |
| NM_006007       | Hs.406096 | 7763   | ZA20D2     | Zinc finger, A20 domain containing 2                                            |
| NM_145058       | Hs.488173 | 196383 | MGC7036    | Hypothetical protein MGC7036                                                    |
| NM_018837       | Hs.162016 | 55959  | SULF2      | Sulfatase 2                                                                     |
| ENST00000252744 |           |        |            |                                                                                 |
| NM_000189       | Hs.406266 | 3099   | HK2        | Hexokinase 2                                                                    |
| NM_00106354     | Hs.426359 | 54458  | KFZp564115 | KFZp564115 protein                                                              |
| NM_005719       | Hs.524741 | 10094  | ARPC3      | Actin related protein 2/3 complex, subunit 3, 21kDa                             |
| NM_032231       | Hs.439548 | 84191  | FLJ22875   | Hypothetical protein FLJ22875                                                   |
| NM_001780       | Hs.445570 | 967    | CD63       | CD63 antigen (melanoma 1 antigen)                                               |
| NM_001780       | Hs.445570 | 967    | CD63       | CD63 antigen (melanoma 1 antigen)                                               |
| NM_014017       | Hs.351629 | 28956  | MABPBP     | Mitogen-activated protein-binding protein-interacting protein                   |
| NM_014017       | Hs.351629 | 28956  | MABPBP     | Mitogen-activated protein-binding protein-interacting protein                   |
| NM_001664       | Hs.247077 | 387    | RHOA       | Ras homolog gene family, member A                                               |
| NM_001664       | Hs.247077 | 387    | RHOA       | Ras homolog gene family, member A                                               |
| NM_018840       | Hs.184062 | 55969  | C20orf24   | Chromosome 20 open reading frame 24                                             |
| NM_005669       | Hs.429608 | 7905   | CSorf18    | Chromosome 5 open reading frame 18                                              |
| NM_000201       | Hs.515126 | 3383   | ICAM1      | Intercellular adhesion molecule 1 (CD54), human rhinovirus receptor             |
| NM_00106377     | Hs.466871 | 5329   | PLAUR      | Plasminogen activator, urokinase receptor                                       |
| NM_004184       | Hs.497599 | 7453   | WARS       | Tryptophanyl-tRNA synthetase                                                    |
| NM_032322       | Hs.29874  | 84282  | RNF135     | Ring finger protein 135                                                         |
| NM_022748       | Hs.520814 | 64759  | TENS1      | Tensin-like SH2 domain containing 1                                             |
| NM_147780       | Hs.520898 | 1508   | CTS8       | Cathepsin B                                                                     |
| NM_003937       | Hs.470126 | 8942   | KYNU       | Kynureninase (L-kynurenine hydrolase)                                           |
| NM_016006       | Hs.19385  | 51099  | ABHD5      | Abhydrolase domain containing 5                                                 |
| NM_003937       | Hs.470126 | 8942   | KYNU       | Kynureninase (L-kynurenine hydrolase)                                           |
| NM_004781       | Hs.66708  | 9341   | VAMP3      | Vesicle-associated membrane protein 3 (cellubrevin)                             |
| NM_021629       | Hs.270543 | 59345  | GNB4       | Guanine nucleotide binding protein (G protein), beta polypeptide 4              |
| NM_000574       | Hs.527653 | 1604   | DAF        | Decay accelerating factor for complement (CD55, Cromer blood group system)      |
| NM_004125       | Hs.534196 | 2790   | GNGL1      | Guanine nucleotide binding protein (G protein), gamma 10                        |
| NM_022488       | Hs.477126 | 64422  | APG3L      | APG3 autophagy 3-like (S. cerevisiae)                                           |
| NM_006136       | Hs.446123 | 830    | CAPZA2     | Capping protein (actin filament) muscle Z-line, alpha 2                         |
| THC2398355      |           |        |            |                                                                                 |
| NM_000358       | Hs.369397 | 7045   | TGFB1      | Transforming growth factor, beta-induced, 68kDa                                 |
| NM_012307       | Hs.213394 | 23136  | EPB41L3    | Erythrocyte membrane protein band 4.1-like 3                                    |
| NM_016613       | Hs.323583 | 51313  | KFZp434L14 | Hypothetical protein KFZp434L14                                                 |
| NM_005625       | Hs.200804 | 6386   | SDCBP      | Syndecan binding protein (syntenin)                                             |
| NM_206866       | Hs.154276 | 571    | BACH1      | BTB and CNC homology 1, basic leucine zipper transcription factor 1             |
| NM_001063743    | Hs.509909 | 8650   | NUMB       | Numb homolog (Drosophila)                                                       |
| NM_006895       | Hs.42151  | 3176   | HNMT       | Histamine N-methyltransferase                                                   |
| NM_012198       | Hs.377894 | 25801  | GCA        | Grancalcin, EF-hand calcium binding protein                                     |
| NM_000416       | Hs.520414 | 3459   | IFNGR1     | Interferon gamma receptor 1                                                     |
| NM_013995       | Hs.496684 | 3920   | LAMP2      | Lysosomal-associated membrane protein 2                                         |
| NM_015205       |           |        |            |                                                                                 |
| NM_005443       | Hs.368610 | 9061   | PAPS1      | 3'-phosphoadenosine 5'-phosphosulfate synthase 1                                |
| NM_001311       | Hs.233389 | 54504  | CPVL       | Carboxypeptidase, vitellogenic-like                                             |
| NM_001386       | Hs.173381 | 1808   | DPYSL2     | Dihydropyrimidinase-like 2                                                      |
| NM_001386       | Hs.173381 | 1808   | DPYSL2     | Dihydropyrimidinase-like 2                                                      |
| NM_024576       | Hs.16512  | 79627  | OGFR1L1    | Opioid growth factor receptor-like 1                                            |
| NM_004800       | Hs.130413 | 9375   | TM9SF2     | Transmembrane 9 superfamily member 2                                            |
| NM_004800       | Hs.130413 | 9375   | TM9SF2     | Transmembrane 9 superfamily member 2                                            |
| NM_003380       | Hs.533317 | 7431   | VIM        | Vimentin                                                                        |
| NM_003380       | Hs.533317 | 7431   | VIM        | Vimentin                                                                        |
| A_24_P596251    |           |        |            |                                                                                 |
| NM_001903       | Hs.445981 | 1495   | CTNNA1     | Catenin (cadherin-associated protein), alpha 1, 102kDa                          |
| A_23_P165819    |           |        |            |                                                                                 |
| A_23_P347100    |           |        |            |                                                                                 |
| A_24_P110591    |           |        |            |                                                                                 |
| A_32_P100338    |           |        |            |                                                                                 |

|                 |           |        |             |                                                                                                                                       |
|-----------------|-----------|--------|-------------|---------------------------------------------------------------------------------------------------------------------------------------|
| NM_014608       | Hs.26704  | 23191  | CYFIP1      | Cytoplasmic FMR1 interacting protein 1                                                                                                |
| NM_017740       | Hs.461610 | 55625  | ZDHHC7      | Zinc finger, DHHC domain containing 7                                                                                                 |
| NM_003505       | Hs.94234  | 8321   | FZD1        | Frizzled homolog 1 (Drosophila)                                                                                                       |
| NM_020792       | Hs.444099 | 57552  | KIAA1363    | KIAA1363 protein                                                                                                                      |
| NM_003043       | Hs.529488 | 6533   | SLC6A6      | Solute carrier family 6 (neurotransmitter transporter, taurine), member 6                                                             |
| NM_001466       | Hs.142012 | 2535   | FZD2        | Frizzled homolog 2 (Drosophila)                                                                                                       |
| NM_001766       | Hs.1799   | 912    | CD10        | CD10 antigen, d polypeptide                                                                                                           |
| NM_000021       | Hs.3260   | 5663   | PSEN1       | Presenilin 1 (Alzheimer disease 3)                                                                                                    |
| NM_032717       | Hs.99196  | 84803  | MGC11324    | Hypothetical protein MGC11324                                                                                                         |
| NM_198833       | Hs.368077 | 5271   | SERPINB8    | Serine (or cysteine) proteinase inhibitor, clade B (ovalbumin), member 8                                                              |
| NM_00101355     |           |        |             |                                                                                                                                       |
| BC038432        | Hs.535499 | 5914   | RARA        | Retinoic acid receptor, alpha                                                                                                         |
| NM_001772       | Hs.83731  | 945    | CD33        | CD33 antigen (gp67)                                                                                                                   |
| NM_145166       | Hs.409561 | 92999  | KIAA1190    | Hypothetical protein KIAA1190                                                                                                         |
| NM_001772       | Hs.83731  | 945    | CD33        | CD33 antigen (gp67)                                                                                                                   |
| NM_018125       | Hs.443460 | 55160  | FLJ10521    | Hypothetical protein FLJ10521                                                                                                         |
| NM_018125       | Hs.443460 | 55160  | FLJ10521    | Hypothetical protein FLJ10521                                                                                                         |
| NM_001381       | Hs.103854 | 1796   | DOCK1       | Docking protein 1, 62kDa (downstream of tyrosine kinase 1)                                                                            |
| NM_004838       | Hs.410683 | 9454   | HOMER3      | Homer homolog 3 (Drosophila)                                                                                                          |
| NM_018071       | Hs.35125  | 55701  | FLJ10357    | Hypothetical protein FLJ10357                                                                                                         |
| NM_004090       | Hs.181046 | 1845   | DUSP3       | Dual specificity phosphatase 3 (vaccinia virus phosphatase VH1-related)                                                               |
| NM_002959       | Hs.485195 | 6272   | SORT1       | Sortilin 1                                                                                                                            |
| NM_032603       | Hs.469045 | 84695  | LOXL3       | Lysyl oxidase-like 3                                                                                                                  |
| NM_014214       | Hs.367992 | 3613   | IMP2        | inositol(myo)-[1-(or 4)-monophosphatase 2                                                                                             |
| NM_002086       | Hs.444356 | 2885   | GRB2        | Growth factor receptor-bound protein 2                                                                                                |
| AF151783        | Hs.522401 | 64855  | C9orf88     | Chromosome 9 open reading frame 88                                                                                                    |
| NM_006066       | Hs.474584 | 10327  | AKR1A1      | Aldo-keto reductase family 1, member A1 (aldehyde reductase)                                                                          |
| NM_001860       | Hs.24030  | 1318   | SLC31A2     | Solute carrier family 31 (copper transporters), member 2                                                                              |
| NM_000404       | Hs.443031 | 2720   | GLB1        | Galactosidase, beta 1                                                                                                                 |
| NM_015510       | Hs.386989 | 25979  | KFZP566008  | KFZP566008 protein                                                                                                                    |
| NM_018084       | Hs.292925 | 55704  | KIAA1212    | KIAA1212                                                                                                                              |
| NM_018084       | Hs.292925 | 55704  | KIAA1212    | KIAA1212                                                                                                                              |
| NM_015892       | Hs.287537 | 51363  | IALNAC45-65 | B cell RAG associated protein                                                                                                         |
| NM_002957       | Hs.20084  | 6256   | RORA        | Retinoid X receptor, alpha                                                                                                            |
| AK096327        | Hs.530899 | 162073 | LOC162073   | Hypothetical protein LOC162073                                                                                                        |
| NM_001690       | Hs.477155 | 523    | ATP6V1A     | ATPase, H+ transporting, lysosomal 70kDa, V1 subunit A                                                                                |
| NM_013322       | Hs.520714 | 29887  | SNX10       | Sorting nexin 10                                                                                                                      |
| AF086044        | Hs.439682 | 29887  | SNX10       | Full length insert cDNA clone YX74D05                                                                                                 |
| NM_013322       | Hs.520714 | 29887  | SNX10       | Sorting nexin 10                                                                                                                      |
| NM_004563       | Hs.75812  | 5106   | PCK2        | Phosphoenolpyruvate carboxylase 2 (mitochondrial)                                                                                     |
| NM_024021       | Hs.325960 | 51358  | MSAMA       | Membrane-spanning 4-domains, subfamily A, member 4                                                                                    |
| NM_003768       | Hs.51216  | 8681   | FEAL5       | Phosphoprotein enriched in astrocytes 15                                                                                              |
| NM_002305       | Hs.445351 | 3956   | LGALS1      | Lectin, galactoside-binding, soluble, 1 (galectin 1)                                                                                  |
| BC105992        |           |        |             |                                                                                                                                       |
| NM_014795       | Hs.34871  | 9839   | ZFX1B       | Zinc finger homeobox 1b                                                                                                               |
| NM_003371       | Hs.369921 | 7410   | VAV2        | Vav 2 oncogene                                                                                                                        |
| U08023          | Hs.306178 | 10461  | MERTK       | C-met proto-oncogene tyrosine kinase                                                                                                  |
| NM_018330       | Hs.501140 | 57698  | KIAA1598    | KIAA1598                                                                                                                              |
| NM_020946       | Hs.435064 | 57706  | KIAA1608    | KIAA1608                                                                                                                              |
| NM_001621       | Hs.171189 | 196    | AHR         | Aryl hydrocarbon receptor                                                                                                             |
| NM_006224       | Hs.429819 | 5306   | PITPNA      | Phosphatidylinositol transfer protein, alpha                                                                                          |
| NM_002306       | Hs.531081 | 3958   | LGALS3      | Lectin, galactoside-binding, soluble, 3 (galectin 3)                                                                                  |
| NM_015326       |           |        |             |                                                                                                                                       |
| NM_004832       | Hs.190028 | 9446   | GSTO1       | Glutathione S-transferase omega 1                                                                                                     |
| NM_004832       | Hs.190028 | 9446   | GSTO1       | Glutathione S-transferase omega 1                                                                                                     |
| NM_016641       | Hs.512607 | 51573  | MIR16       | Membrane interacting protein of RGS16                                                                                                 |
| ENST00000372072 |           |        |             |                                                                                                                                       |
| NM_005177       | Hs.463074 | 535    | ATP6VA1     | ATPase, H+ transporting, lysosomal V0 subunit a isoform 1                                                                             |
| NM_006054       | Hs.473761 | 10313  | RTN3        | Reticulon 3                                                                                                                           |
| NM_002065       | Hs.518525 | 2752   | GLUL        | Glutamate-ammonia ligase (glutamine synthase)                                                                                         |
| NM_014325       | Hs.330384 | 23603  | CORO1C      | Coronin, actin binding protein, 1C                                                                                                    |
| ENST00000376611 |           |        |             |                                                                                                                                       |
| ENST00000376611 |           |        |             |                                                                                                                                       |
| NM_138931       | Hs.478588 | 604    | BCL6        | B-cell CLL/lymphoma 6 (zinc finger protein 51)                                                                                        |
| NM_000130       | Hs.30054  | 2153   | F5          | Coagulation factor V (proaccelerin, labile factor)                                                                                    |
| NM_182898       | Hs.437075 | 9586   | CREB5       | CAMP responsive element binding protein 5                                                                                             |
| NM_003997       |           |        |             |                                                                                                                                       |
| NM_016134       | Hs.156178 | 10404  | PGCP        | Plasma glutamate carboxypeptidase                                                                                                     |
| NM_004881       | Hs.50649  | 9540   | TP53I3      | Tumor protein p53 inducible protein 3                                                                                                 |
| NM_174918       | Hs.178703 | 199675 | LOC199675   | Hypothetical protein LOC199675                                                                                                        |
| NM_004580       | Hs.298651 | 5873   | RAB27A      | RAB27A, member RAS oncogene family                                                                                                    |
| NM_020375       | Hs.504545 | 57103  | C12orf5     | Chromosome 12 open reading frame 5                                                                                                    |
| NM_016131       | Hs.467960 | 10890  | RAB10       | RAB10, member RAS oncogene family                                                                                                     |
| NM_000293       | Hs.78060  | 5257   | PHK8        | Phosphorylase kinase, beta                                                                                                            |
| NM_001779       | Hs.34341  | 965    | CD58        | CD58 antigen, (lymphocyte function-associated antigen 3)                                                                              |
| NM_016009       | Hs.136309 | 51100  | SH3GLB1     | SH3-domain GRB2-like endophilin B1                                                                                                    |
| NM_004339       | Hs.474010 | 754    | PITG1P      | Pituitary tumor-transforming 1 interacting protein                                                                                    |
| NM_014453       | Hs.12107  | 27243  | BC2         | Putative breast adenocarcinoma marker (32kD)                                                                                          |
| NM_002961       | Hs.81256  | 6275   | S100P4      | S100 calcium binding protein A4 (calcium protein, calvasculin, metastasin, murine placental homolog)                                  |
| NM_000521       | Hs.69293  | 3074   | HEXB        | Hexosaminidase B (beta polypeptide)                                                                                                   |
| NM_145791       | Hs.389700 | 4257   | MGST1       | Microsomal glutathione S-transferase 1                                                                                                |
| NM_006100       | Hs.148716 | 10402  | SIAT10      | Sialyltransferase 10 (alpha-2,3-sialyltransferase VI)                                                                                 |
| NM_005896       | Hs.11223  | 3417   | IDH1        | Isocitrate dehydrogenase 1 (NADP+), soluble                                                                                           |
| NM_003099       | Hs.188634 | 6642   | SNX1        | Sorting nexin 1                                                                                                                       |
| NM_00102857     | Hs.511605 | 302    | ANXA2       | Annexin A2                                                                                                                            |
| NM_00102857     | Hs.511605 | 302    | ANXA2       | Annexin A2                                                                                                                            |
| NR_001562       |           |        |             |                                                                                                                                       |
| THC2271508      |           |        |             |                                                                                                                                       |
| NR_001446       |           |        |             |                                                                                                                                       |
| NM_003953       | Hs.493919 | 9019   | MPZL1       | Myelin protein zero-like 1                                                                                                            |
| NM_001037171    |           |        |             |                                                                                                                                       |
| U09195          | Hs.527484 |        |             | Transcribed locus, moderately similar to NP_976029.1 recombinant binding protein suppressor of hairless (Drosophila) [Homo sapiens]   |
| NM_198252       | Hs.522373 | 2934   | GSN         | Gelsolin (amyloidosis, Finnish type)                                                                                                  |
| NM_001288       | Hs.414565 | 1192   | CLIC1       | Chloride intracellular channel 1                                                                                                      |
| NM_020532       | Hs.429581 | 57142  | RTN4        | Reticulon 4                                                                                                                           |
| NM_153649       | Hs.146070 | 7170   | TPM3        | Tropomyosin 3                                                                                                                         |
| NM_153649       | Hs.146070 | 7170   | TPM3        | Tropomyosin 3                                                                                                                         |
| NM_001013848    |           |        |             |                                                                                                                                       |
| NM_001001342    | Hs.34906  | 282991 | BLOC1S2     | Biogenesis of lysosome-related organelles complex-1, subunit 2                                                                        |
| NM_004688       | Hs.54483  | 9111   | NMI         | N-myc (and STAT) interactor                                                                                                           |
| NM_002356       | Hs.519909 | 4082   | MARCKS      | Myristoylated alanine-rich protein kinase C substrate                                                                                 |
| NM_006296       | Hs.468623 | 7444   | VRK2        | Vaccinia related kinase 2                                                                                                             |
| NM_000321       | Hs.408528 | 5925   | RB1         | Retinoblastoma 1 (including osteosarcoma)                                                                                             |
| CR03437         | Hs.173030 |        |             | cDNA FLJ34013 fs, clone FC88F2002111                                                                                                  |
| NM_015469       | Hs.530275 | 25934  | NIPSNAP3A   | Nipsnap homolog 3A (C. elegans)                                                                                                       |
| BC031645        | Hs.1309   | 909    | CD1A        | CD1A antigen, a polypeptide                                                                                                           |
| NM_001153       | Hs.422986 | 307    | ANXA4       | Annexin A4                                                                                                                            |
| NM_014713       | Hs.467807 | 9741   | LAPTM4A     | Lysosomal-associated protein transmembrane 4 alpha                                                                                    |
| NM_018840       | Hs.184062 | 55969  | C20orf24    | Chromosome 20 open reading frame 24                                                                                                   |
| NM_004125       | Hs.534196 | 2790   | GNGL0       | Guanine nucleotide binding protein (G protein), gamma 10                                                                              |
| NM_174909       | Hs.355606 | 153339 | MGC23909    | Hypothetical protein MGC23909                                                                                                         |
| NM_174909       | Hs.355606 | 153339 | MGC23909    | Hypothetical protein MGC23909                                                                                                         |
| NM_000183       | Hs.515848 | 3032   | HADHB       | Hydroxyacyl-Coenzyme A dehydrogenase/3-ketocacyl-Coenzyme A thiolase/enoyl-Coenzyme A hydratase (trifunctional protein), beta subunit |
| NM_002199       | Hs.511251 | 58472  | SQRDL       | Sulfide quinone reductase-like (yeast)                                                                                                |
| NM_033306       | Hs.138378 | 837    | CASP4       | Caspase 4, apoptosis-related cysteine protease                                                                                        |
| NM_133646       | Hs.444451 | 51776  | ZAK         | Sterile alpha motif and leucine zipper containing kinase AZK                                                                          |
| THC246337       |           |        |             |                                                                                                                                       |
| NM_015364       | Hs.69328  | 23643  | LY96        | Lymphocyte antigen 96                                                                                                                 |
| A_24_P24890     |           |        |             |                                                                                                                                       |
| NM_024408       | Hs.487360 | 4853   | NOTCH2      | Notch homolog 2 (Drosophila)                                                                                                          |
| NM_022473       | Hs.511143 | 64397  | SH3BP3      | SH3-domain binding protein 3                                                                                                          |
| NM_012331       | Hs.490981 | 4482   | MSRA        | Methionine sulfoxide reductase A                                                                                                      |
| NM_001017980    |           |        |             |                                                                                                                                       |

|                 |           |        |             |                                                                                                                |
|-----------------|-----------|--------|-------------|----------------------------------------------------------------------------------------------------------------|
| BC110326        |           |        |             |                                                                                                                |
| NM_006729       | Hs.226483 | 1730   | DIAPH2      | Diaphanous homolog 2 (Drosophila)                                                                              |
| NM_018639       | Hs.506985 | 55884  | WSB2        | WD repeat and SOCS box-containing 2                                                                            |
| NM_153605       |           |        |             |                                                                                                                |
| NM_005900       | Hs.519005 | 4086   | SMAD1       | SMAD, mothers against DPP homolog 1 (Drosophila)                                                               |
| AF126020        | Hs.303787 | 55973  | BCAP29      | B-cell receptor-associated protein 29                                                                          |
| NM_000367       | Hs.444319 | 7172   | TPMT        | Thiopurine S-methyltransferase                                                                                 |
| NM_000367       | Hs.444319 | 7172   | TPMT        | Thiopurine S-methyltransferase                                                                                 |
| NM_212472       | Hs.280342 | 5573   | PRKARIA     | Protein kinase, cAMP-dependent, regulatory, type I, alpha (tissue specific extinguisher 1)                     |
| NM_002874       | Hs.521640 | 5887   | RAD23B      | RAD23 homolog B (S. cerevisiae)                                                                                |
| NM_016239       | Hs.389996 | 51142  | CNCHD2      | Coiled-coil-helix-coiled-coil-helix domain containing 2                                                        |
| NM_001679       | Hs.477789 | 483    | ATP1B3      | ATPase, Na <sup>+</sup> /K <sup>+</sup> transporting, beta 3 polypeptide                                       |
| NM_016545       | Hs.15725  | 51278  | IER5        | Immediate early response 5                                                                                     |
| NM_001743       | Hs.468442 | 805    | CALM2       | Calmodulin 2 (phosphorylase kinase, delta)                                                                     |
| NM_021149       | Hs.289092 | 23406  | COTL1       | Coactosin-like 1 (Dictyostelium)                                                                               |
| NM_021149       | Hs.289092 | 23406  | COTL1       | Coactosin-like 1 (Dictyostelium)                                                                               |
| NM_005801       | Hs.150580 | 10209  | SUI1        | Putative translation initiation factor                                                                         |
| NM_005801       | Hs.150580 | 10209  | SUI1        | Putative translation initiation factor                                                                         |
| NM_006851       | Hs.205558 | 11010  | GLP1R1      | GLI pathogenesis-related 1 (glioma)                                                                            |
| NM_014737       | Hs.379970 | 9770   | RASSF2      | Ras association (RafGDS/AF-6) domain family 2                                                                  |
| BC031655        | Hs.10649  | 9473   | Clorf38     | Chromosome 1 open reading frame 38                                                                             |
| NM_006703       | Hs.188882 | 11165  | NUDT3       | Nudix (nucleoside diphosphate linked moiety X)-type motif 3                                                    |
| ENST00000297423 |           |        |             |                                                                                                                |
| NM_002294       | Hs.496684 | 3920   | LAMP2       | Lysosomal-associated membrane protein 2                                                                        |
| NM_018196       | Hs.133321 | 55217  | TM6HE       | Trimethyllysine hydroxylase, epsilon                                                                           |
| NM_016422       | Hs.44685  | 50862  | RNF141      | Ring finger protein 141                                                                                        |
| NM_030769       | Hs.496969 | 80896  | NPL         | N-acetylneuraminatase pyruvate lyase (dihydrodipicolinate synthase)                                            |
| NM_001024074    |           |        |             |                                                                                                                |
| NM_182755       | Hs.128037 | 220929 | LOC220929   | Hypothetical protein LOC220929                                                                                 |
| NM_152395       | Hs.282050 | 131870 | FLJ31265    | Hypothetical protein FLJ31265                                                                                  |
| NM_018370       | Hs.525634 | 55332  | FLJ11259    | Hypothetical protein FLJ11259                                                                                  |
| NM_018370       | Hs.525634 | 55332  | FLJ11259    | Hypothetical protein FLJ11259                                                                                  |
| NM_033429       | Hs.435457 | 91860  | CALML4      | Calmodulin-like 4                                                                                              |
| NM_003930       | Hs.200770 | 8935   | SCAP2       | Src family associated phosphoprotein 2                                                                         |
| NM_018993       | Hs.472270 | 54453  | RIN2        | Ras and Rab interactor 2                                                                                       |
| NM_021090       | Hs.474536 | 8897   | MTMR3       | Mitochondrial related protein 3                                                                                |
| NM_138473       | Hs.524461 | 6667   | SP1         | Sp1 transcription factor                                                                                       |
| AK131269        | Hs.377830 | 154141 | OACT1       | O-acyltransferase (membrane bound) domain containing 1                                                         |
| NM_006136       | Hs.446123 | 830    | CAPZA2      | Capping protein (actin filament) muscle Z-line, alpha 2                                                        |
| NM_032782       | Hs.155111 | 84868  | HAVCR2      | Hepatitis A virus cellular receptor 2                                                                          |
| NM_032782       | Hs.155111 | 84868  | HAVCR2      | Hepatitis A virus cellular receptor 2                                                                          |
| AF011794        | Hs.185051 | 9236   | CPNP1       | Phosphatidylinositol glycan, class B                                                                           |
| NM_203481       | Hs.459574 | 403340 | MGC70870    | Hypothetical LOC403340                                                                                         |
| NM_018353       | Hs.437941 | 55320  | C14orf106   | Chromosome 14 open reading frame 106                                                                           |
| D31888          | Hs.510521 | 23186  | RCOR1       | REST corepressor 1                                                                                             |
| NM_013257       | Hs.380877 | 23678  | SGKL        | Serum/glucocorticoid regulated kinase-like                                                                     |
| ENST00000342158 |           |        |             |                                                                                                                |
| NM_014873       |           |        |             |                                                                                                                |
| NM_000153       | Hs.513439 | 2581   | GALC        | Galactosylceramidase (Krabbe disease)                                                                          |
| NM_030627       | Hs.127126 | 80315  | CPEB4       | Cytoplasmic polyadenylation element binding protein 4                                                          |
| NM_016422       | Hs.44685  | 50862  | RNF141      | Ring finger protein 141                                                                                        |
| ENST00000373210 |           |        |             |                                                                                                                |
| NM_000110       | Hs.335034 | 1806   | DPYD        | Dihydropyrimidine dehydrogenase                                                                                |
| NM_006537       | Hs.458499 | 9960   | USP3        | Ubiquitin specific protease 3                                                                                  |
| NM_002729       | Hs.118651 | 3087   | HHEX        | Hematopoietically expressed homeobox                                                                           |
| NM_018340       | Hs.460002 | 55313  | FLJ11151    | Hypothetical protein FLJ11151                                                                                  |
| ENST00000265149 |           |        |             |                                                                                                                |
| NM_018420       | Hs.125482 | 55356  | SLC22A15    | Solute carrier family 22 (organic cation transporter), member 15                                               |
| NM_206855       | Hs.510324 | 9444   | QKI         | Quaking homolog, KH domain RNA binding (mouse)                                                                 |
| NM_003338       | Hs.129683 | 7321   | UBE2D1      | Ubiquitin-conjugating enzyme E2D 1 (UBC4/S homolog, yeast)                                                     |
| NM_016218       | Hs.502458 | 51317  | BHC61       | BRAC35/HDC2 complex (80 kDa)                                                                                   |
| NM_012249       | Hs.442989 | 23433  | RHOQ        | Ras homolog gene family, member Q                                                                              |
| NM_012249       | Hs.442989 | 23433  | RHOQ        | Ras homolog gene family, member Q                                                                              |
| NM_017724       | Hs.475319 | 9209   | LRRFIP2     | Leucine rich repeat (in FLI) interacting protein 2                                                             |
| NM_015071       | Hs.293593 | 23092  | ARHGAP26    | Rho GTPase activating protein 26                                                                               |
| NM_003177       | Hs.371720 | 6850   | SYK         | Spleen tyrosine kinase                                                                                         |
| BE35679         |           |        |             |                                                                                                                |
| NM_182757       | Hs.148741 | 255488 | IBRDCC2     | IBR domain containing 2                                                                                        |
| ENST00000379426 |           |        |             |                                                                                                                |
| NM_005615       | Hs.23262  | 6039   | RNASE6      | Ribonuclease, RNase A family, k6                                                                               |
| NM_014033       | Hs.288771 | 25840  | KFZP586A052 | DKFZP586A052 protein                                                                                           |
| XM_379036       | Hs.191031 | 400890 |             | Hypothetical LOC400890                                                                                         |
| NM_006549       | Hs.297343 | 10645  | CAMKK2      | Calcium/calmodulin-dependent protein kinase kinase 2, beta                                                     |
| NM_002350       | Hs.491767 | 4067   | LYN         | V-yes-1 Yamaguchi sarcoma viral related oncogene homolog                                                       |
| AK097411        | Hs.121081 | 401196 | FLJ40092    | FLJ40092 protein                                                                                               |
| NM_019027       | Hs.518727 | 54502  | FLJ20273    | RNA-binding protein                                                                                            |
| NM_000397       | Hs.292356 | 1536   | CYBB        | Cytochrome b-245, beta polypeptide (chronic granulomatous disease)                                             |
| NM_030912       | Hs.336810 | 81603  | TRIM8       | Tripartite motif-containing 8                                                                                  |
| NM_001690155    | Hs.473155 | 523    | ATP6V1A     | ATPase, H <sup>+</sup> transporting, lysosomal 70kDa, V1 subunit A                                             |
| NM_00101664     | Hs.333297 | 339745 | LOC339745   | Hypothetical protein LOC339745                                                                                 |
| NM_018084       | Hs.292925 | 55704  | KIAA1212    | KIAA1212                                                                                                       |
| NM_015075       | Hs.7483   | 23096  | IQSEC2      | IQ motif and Sec7 domain 2                                                                                     |
| BX648299        | Hs.468274 | 6546   | SLC8A1      | Solute carrier family 8 (sodium/calcium exchanger), member 1                                                   |
| NM_177438       | Hs.87889  | 23405  | DICER1      | Dicer1, Dcr-1 homolog (Drosophila)                                                                             |
| NM_181354       | Hs.148778 | 55074  | OXRI1       | Oxidation resistance 1                                                                                         |
| NM_139241       | Hs.117835 | 121512 | FGO4        | FYVE, RhoGEF and PH domain containing 4                                                                        |
| BC010544        | Hs.144583 |        |             | CDNA clone IMAGE:3462401, partial cds                                                                          |
| BC010544        | Hs.144583 |        |             | CDNA clone IMAGE:3462401, partial cds                                                                          |
| NM_015704       |           |        |             |                                                                                                                |
| NM_003004       | Hs.546296 | 6398   | SECTM1      | Secreted and transmembrane 1                                                                                   |
| AA303143        | Hs.436973 | 9658   | ZNF516      | Zinc finger protein 516                                                                                        |
| NM_018664       | Hs.62919  | 55509  | SNF1        | Jun dimerization protein p21SNF1                                                                               |
| NM_004235       | Hs.376206 | 9314   | KLF4        | Kruppel-like factor 4 (aut)                                                                                    |
| NM_032020       | Hs.17680  | 2519   | FUCA2       | Fucosidase, alpha-L-2, plasma                                                                                  |
| NM_031301       | Hs.511703 | 83464  | PSFL        | Anterior pharynx defective 1B-like                                                                             |
| NM_014186       | Hs.279836 | 29099  | COMMD9      | COMMD domain containing 9                                                                                      |
| BC022928        | Hs.382824 |        |             | Homo sapiens, similar to phosphoglycerate mutase 1 (brain), clone IMAGE:3457540, mRNA                          |
| NM_002629       | Hs.447492 | 5223   | PGAM1       | Phosphoglycerate mutase 1 (brain)                                                                              |
| NM_000169       | Hs.69089  | 2717   | GLA         | Galactosidase, alpha                                                                                           |
| NM_001010931    |           |        |             |                                                                                                                |
| NM_005779       | Hs.79299  | 10184  | LHFPL2      | Lipoma HMGIC fusion partner-like 2                                                                             |
| XM_930086       |           |        |             |                                                                                                                |
| NM_018404       | Hs.514063 | 55803  | CENTA2      | Centaurin, alpha 2                                                                                             |
| NM_001525       | Hs.388026 | 3061   | HCRTR1      | Hypocretin (orexin) receptor 1                                                                                 |
| NM_015510       | Hs.386989 | 25979  | KFZP566O08  | DKFZP566O08 protein                                                                                            |
| NM_152395       | Hs.282050 | 131870 | FLJ31265    | Hypothetical protein FLJ31265                                                                                  |
| NM_006309       | Hs.475319 | 9209   | LRRFIP2     | Leucine rich repeat (in FLI) interacting protein 2                                                             |
| NM_014806       | Hs.493796 | 9853   | RUSC2       | RUN and SH3 domain containing 2                                                                                |
| BC063531        | Hs.13999  | 23309  | SIN3B       | SIN3 homolog B, transcriptional regulator (yeast)                                                              |
| NM_006730       | Hs.77091  | 1774   | DNASE1L1    | Deoxyribonuclease I-like 1                                                                                     |
| NM_018404       | Hs.514063 | 55803  | CENTA2      | Centaurin, alpha 2                                                                                             |
| NM_021205       | Hs.435106 | 58480  | RHOJ        | Ras homolog gene family, member U                                                                              |
| AB082524        | Hs.177633 | 403341 | ZBTB34      | Zinc finger and BTB domain containing 34                                                                       |
| NM_022763       | Hs.159430 | 64778  | FAD104      | Factor for adipocyte differentiation 104                                                                       |
| NM_006636       | Hs.469030 | 10797  | MTHFD2      | Methylene tetrahydrofolate dehydrogenase (NAD <sup>+</sup> dependent), methenyltetrahydrofolate cyclohydrolase |
| NM_022763       | Hs.159430 | 64778  | FAD104      | Factor for adipocyte differentiation 104                                                                       |
| NM_198507       | Hs.356108 | 345757 | UNC93B2     | HSS, RE408                                                                                                     |
| NM_147156       | Hs.386215 | 259230 | TMEM23      | Transmembrane protein 23                                                                                       |
| NM_032839       | Hs.477346 | 84925  | DIRC2       | Disrupted in renal carcinoma 2                                                                                 |
| ENST00000382592 |           |        |             |                                                                                                                |
| NM_001001330    | Hs.499833 | 221035 | C10orf74    | Chromosome 10 open reading frame 74                                                                            |
| NM_177438       | Hs.87889  | 23405  | DICER1      | Dicer1, Dcr-1 homolog (Drosophila)                                                                             |

List of genes located in the JAK2 Cluster

| RefSeq          | UniGene   | Gene ID | Gene      | Description                                                                                   |
|-----------------|-----------|---------|-----------|-----------------------------------------------------------------------------------------------|
| NM_004665       | Hs.293130 | 8875    | VNN2      | Vanin 2                                                                                       |
| NM_198578       |           |         |           |                                                                                               |
| NM_020856       | Hs.278436 | 57616   | ZNF537    | Zinc finger protein 537                                                                       |
| NM_000631       | Hs.474781 | 4689    | NCF4      | Neutrophil cytosolic factor 4, 40kDa                                                          |
| NM_053054       | Hs.189105 | 117144  | CATSPER1  | Cation channel, sperm associated 1                                                            |
| NM_004334       | Hs.169998 | 683     | BST1      | Bone marrow stromal cell antigen 1                                                            |
| NM_017629       | Hs.471492 | 192670  | EIF2C4    | Eukaryotic translation initiation factor 2C, 4                                                |
| NM_002357       | Hs.468908 | 4084    | MAAD      | MAX dimerization protein 1                                                                    |
| NM_019018       | Hs.528644 | 54491   | FLJ11127  | Hypothetical protein FLJ11127                                                                 |
| NM_006504       | Hs.127022 | 5791    | PTPRE     | Protein tyrosine phosphatase, receptor type, E                                                |
| NM_016621       | Hs.502458 | 51317   | BHC80     | BRAF35/HDAC2 complex (80 kDa)                                                                 |
| NM_001017986    |           |         |           |                                                                                               |
| NM_020415       | Hs.283091 | 56729   | RETN      | Resistin                                                                                      |
| NM_001001188    | Hs.369759 | 7226    | TRPM2     | Transient receptor potential cation channel, subfamily M, member 2                            |
| NM_020350       | Hs.454438 | 57085   | ACTRAP    | Angiotensin II receptor-associated protein                                                    |
| NM_002934       | Hs.728    | 6036    | RNASE2    | Ribonuclease, RNase A family, 2 (liver, eosinophil-derived neurotoxin)                        |
| NM_002934       | Hs.728    | 6036    | RNASE2    | Ribonuclease, RNase A family, 2 (liver, eosinophil-derived neurotoxin)                        |
| NM_080387       | Hs.351811 | 338339  | CLEC5F8   | C-type (calcium dependent, carbohydrate-recognition domain) lectin, superfamily member 8      |
| XM_938207       |           |         |           |                                                                                               |
| A_24_P872359    |           |         |           |                                                                                               |
| NM_003263       | Hs.111805 | 7096    | TLR1      | Toll-like receptor 1                                                                          |
| NM_001987       | Hs.504765 | 2120    | ETV6      | Ets variant gene 6 (TEL oncogene)                                                             |
| NM_138444       | Hs.109438 | 115207  | KCTD12    | Potassium channel tetramerisation domain containing 12                                        |
| NM_004614       | Hs.512619 | 7084    | TK2       | Thymidine kinase 2, mitochondrial                                                             |
| AV692191        | Hs.512619 | 7084    | TK2       | Thymidine kinase 2, mitochondrial                                                             |
| NM_213662       | Hs.463059 | 6774    | STAT3     | Signal transducer and activator of transcription 3 (acute-phase response factor)              |
| NM_024872       | Hs.153343 | 79950   | DOK3      | Docking protein 3                                                                             |
| NM_003183       | Hs.404914 | 6868    | ADAM17    | A disintegrin and metalloprotease domain 17 (tumor necrosis factor, alpha, converting enzyme) |
| NM_004972       | Hs.434374 | 3717    | JAK2      | Janus kinase 2 (a protein tyrosine kinase)                                                    |
| NM_021642       | Hs.352642 | 2212    | FCGR2A    | Fc fragment of IgG, low affinity IIA, receptor for (CD32)                                     |
| NM_005160       | Hs.517493 | 157     | ADRBK2    | Adrenergic, beta, receptor kinase 2                                                           |
| NM_004041       | Hs.503284 | 408     | ARRB1     | Arrestin, beta 1                                                                              |
| NM_007166       | Hs.163893 | 8301    | PICALM    | Phosphatidylinositol binding clathrin assembly protein                                        |
| AK003083        | Hs.29106  | 65940   | DUSP22    | Dual specificity phosphatase 22                                                               |
| NM_052950       | Hs.208550 | 115825  | WDFY2     | WD repeat and FYVE domain containing 2                                                        |
| NM_171846       | Hs.410388 | 114294  | LACTB     | Lactamase, beta                                                                               |
| NM_015264       |           |         |           |                                                                                               |
| BC045716        | Hs.454036 |         |           | Homo sapiens, Similar to syndecan binding protein (syntenin), clone IMAGE:4814292, mRNA       |
| NM_181657       | Hs.525256 | 1241    | LTBR      | Leukotriene B4 receptor                                                                       |
| NM_017510       | Hs.279929 | 54732   | HSGP25L2G | Gp25L2 protein                                                                                |
| NM_001014436    |           |         |           |                                                                                               |
| NM_007126       | Hs.529782 | 7415    | VCP       | Valosin-containing protein                                                                    |
| NM_006659       | Hs.523370 | 10844   | TUBGCP2   | Tubulin, gamma complex associated protein 2                                                   |
| THC2273031      |           |         |           |                                                                                               |
| NM_052949       | Hs.130434 | 115727  | RASGRP4   | RAS guanyl releasing protein 4                                                                |
| NM_018421       |           |         |           |                                                                                               |
| NR_003061       |           |         |           |                                                                                               |
| NM_006863       | Hs.534393 | 11024   | LILRA1    | Leukocyte immunoglobulin-like receptor, subfamily B (with TM and ITIM domains), member 1      |
| NM_172313       | Hs.524517 | 1441    | CSF3R     | Colony stimulating factor 3 receptor (granulocyte)                                            |
| NM_006065       | Hs.134565 | 10326   | SIRPB1    | Signal-regulatory protein beta 1                                                              |
| NM_000578       | Hs.471393 | 6556    | SLC11A1   | Solute carrier family 11 (proton-coupled divalent metal ion transporters), member 1           |
| NM_172088       | Hs.54673  | 8741    | TNFSF13   | Tumor necrosis factor (ligand) superfamily, member 12                                         |
| NM_017585       | Hs.244378 | 11182   | SLC2A6    | Solute carrier family 2 (facilitated glucose transporter), member 6                           |
| ENST00000343732 |           |         |           |                                                                                               |
| NM_006678       | Hs.2605   | 10871   | CMRF35    | CMRF35 leukocyte immunoglobulin-like receptor                                                 |
| NM_014308       | Hs.278901 | 23533   | PIK3R5    | Phosphoinositide-3-kinase, regulatory subunit 5, p101                                         |
| NM_172390       | Hs.534074 | 4772    | NFATC1    | Nuclear factor of activated T-cells, cytoplasmic, calcineurin-dependent 1                     |
| NM_012335       | Hs.408451 | 4542    | MYO1F     | Myosin IF                                                                                     |
| NM_000803       | Hs.433159 | 2350    | FOLR2     | Folate receptor 2 (fetal)                                                                     |
| A_32_P136130    |           |         |           |                                                                                               |
| A_32_P52144     |           |         |           |                                                                                               |
| NM_000952       | Hs.46     | 5724    | PTAFR     | Platelet-activating factor receptor                                                           |
| NM_001007232    | Hs.44102  | 440068  | INCA      | Inhibitory caspase recruitment domain (CARD) protein                                          |
| AK056836        | Hs.48353  | 150166  | LOC150166 | Hypothetical protein LOC150166                                                                |
| NM_198540       | Hs.441681 | 374907  | B3GAL17   | UDP-Gal:betaGal beta 1,3-galactosyltransferase polypeptide 7                                  |
| THC240028       |           |         |           |                                                                                               |
| NM_032219       | Hs.334789 | 84179   | FLJ22269  | Hypothetical protein FLJ22269                                                                 |
| NM_152511       | Hs.517544 | 150290  | DUSP18    | Dual specificity phosphatase 18                                                               |
| BI024548        | Hs.352642 | 2212    | FCGR2A    | Fc fragment of IgG, low affinity IIA, receptor for (CD32)                                     |
| N28017          | Hs.519909 | 4082    | MARCKS    | Myristoylated alanine-rich protein kinase C substrate                                         |
| NM_000061       | Hs.159494 | 695     | BTX       | Burton agammaglobulinemia tyrosine kinase                                                     |
| NM_003363       | Hs.77500  | 7375    | USP4      | Ubiquitin specific protease 4 (proto-oncogene)                                                |
| NM_004946       | Hs.325528 | 1794    | DOCK2     | Dedicator of cytokinesis 2                                                                    |
| ENST00000369889 |           |         |           |                                                                                               |
| NM_006504       | Hs.127022 | 5791    | PTPRE     | Protein tyrosine phosphatase, receptor type, E                                                |
| NM_002664       | Hs.468840 | 5341    | PLEK      | Pleckstrin                                                                                    |
| NM_016543       | Hs.274470 | 27036   | SGLEC7    | Sialic acid binding Ig-like lectin 7                                                          |
| AB029488        | Hs.272100 | 29125   | C11orf21  | Chromosome 11 open reading frame 21                                                           |
| NM_005213       | Hs.518198 | 1475    | CSTA      | Cystatin A (stefin A)                                                                         |
| NM_001746       | Hs.529890 | 821     | CANX      | Calnexin                                                                                      |
| AK023743        | Hs.481143 | 91351   | FLJ31033  | Hypothetical protein FLJ31033                                                                 |
| NM_006639       | Hs.201300 | 10800   | CYSLTR1   | Cysteinyl leukotriene receptor 1                                                              |
| NM_003569       | Hs.520383 | 8417    | STX7      | Syntaxin 7                                                                                    |
| NM_152680       | Hs.518090 | 201799  | FLJ32028  | Hypothetical protein FLJ32028                                                                 |
| NM_002661       | Hs.413111 | 5336    | PLG2      | Phospholipase C, gamma 2 (phosphatidylinositol-specific)                                      |
| NM_006561       | Hs.309288 | 10659   | CUGBP2    | CUG triplet repeat, RNA binding protein 2                                                     |
| NM_016281       | Hs.368304 | 51347   | TAOK3     | TAO kinase 3                                                                                  |
| AK022059        | Hs.432755 | 112574  | SNAG1     | Sorting nexin associated golgi protein 1                                                      |
| NM_023037       | Hs.507669 | 10129   | 13CDNA73  | Hypothetical protein CG0003                                                                   |
| NR_002556       |           |         |           |                                                                                               |
| THC2308340      |           |         |           |                                                                                               |
| NM_000885       | Hs.440955 | 3676    | ITGA4     | Integrin, alpha 4 (antigen CD49, alpha 4 subunit of VLA-4 receptor)                           |
| NM_002487       | Hs.524156 | 64421   | DCLRE1C   | DNA cross-link repair 1C (PSO2 homolog, S. cerevisiae)                                        |
| NM_170607       | Hs.383019 | 6945    | TCFL4     | Transcription factor-like 4                                                                   |
| NM_024617       |           |         |           |                                                                                               |
| NM_005472       | Hs.523899 | 10008   | KCNK3     | Potassium voltage-gated channel, Isk-related family, member 3                                 |
| NM_172247       | Hs.520937 | 1438    | CSF2RA    | Colony stimulating factor 2 receptor, alpha, low-affinity (granulocyte-macrophage)            |
| NM_006495       | Hs.5509   | 2124    | EV12B     | Ecotropic viral integration site 2B                                                           |
| NM_152687       | Hs.44930  | 202309  | FLJ33641  | Hypothetical protein FLJ33641                                                                 |
| NM_138554       | Hs.174312 | 7099    | TLR4      | Toll-like receptor 4                                                                          |
| NM_016562       | Hs.179152 | 51284   | TLR7      | Toll-like receptor 7                                                                          |
| NM_006355       | Hs.202510 | 10475   | TRIM38    | Tripartite motif-containing 38                                                                |
| THC2405019      |           |         |           |                                                                                               |
| A_32_P406186    |           |         |           |                                                                                               |

|              |           |        |            |                                                                             |
|--------------|-----------|--------|------------|-----------------------------------------------------------------------------|
| NM_153646    | Hs.510281 | 123041 | SLC24A4    | Solute carrier family 24 (sodium/potassium/calcium exchanger), member 4     |
| NM_001817    | Hs.12     | 1089   | CEACAM4    | Carcinoembryonic antigen-related cell adhesion molecule 4                   |
| 567044       |           |        |            |                                                                             |
| BC041849     |           |        |            |                                                                             |
| AB002311     | Hs.113912 | 9693   | RAPGEF2    | Rap guanine nucleotide exchange factor (GEF) 2                              |
| NM_015268    |           |        |            |                                                                             |
| NM_018325    | Hs.493639 | 203228 | C9orf72    | Chromosome 9 open reading frame 72                                          |
| NM_003414    | Hs.460645 | 10308  | ZNF267     | Zinc finger protein 267                                                     |
| NM_152649    | Hs.119878 | 197259 | FLJ34389   | Hypothetical protein FLJ34389                                               |
| NM_138554    | Hs.174312 | 7099   | TLR4       | Toll-like receptor 4                                                        |
| U09197       | Hs.180284 |        |            | 5.5 kb miRNA upregulated in retinoic acid treated HL-60 neutrophilic cells. |
| NM_014395    | Hs.436271 | 27071  | DAPP1      | Dual adaptor of phosphotyrosine and 3-phosphoinositides                     |
| NM_018710    | Hs.202517 | 55529  | KFZp762007 | Hypothetical protein DKFZp7620076                                           |
| NM_022162    | Hs.135201 | 64127  | CARD15     | Caspase recruitment domain family, member 15                                |
| NM_032812    | Hs.148200 | 84898  | PLXDC2     | Plexin domain containing 2                                                  |
| AB208934     |           |        |            |                                                                             |
| NM_152852    | Hs.523702 | 64231  | MSA6A      | Membrane-spanning 4-domains, subfamily A, member 6A                         |
| AI379175     | Hs.493819 | 152007 | C9orf19    | Chromosome 9 open reading frame 19                                          |
| NM_006313    | Hs.434051 | 9958   | USP15      | Ubiquitin specific protease 15                                              |
| NM_002349    | Hs.153563 | 4065   | LY75       | Lymphocyte antigen 75                                                       |
| THC2439806   |           |        |            |                                                                             |
| A_24_P307395 |           |        |            |                                                                             |
| NM_020644    | Hs.501853 | 56674  | C11orf15   | Chromosome 11 open reading frame 15                                         |
| NM_000161    | Hs.86724  | 2643   | GCH1       | GTP cyclohydrolase 1 (dopa-responsive dystonia)                             |
| THC2375651   |           |        |            |                                                                             |
| AK126364     | Hs.186649 | 54103  | LOC54103   | Hypothetical protein LOC54103                                               |
| NM_172364    | Hs.13768  | 93589  | CACNA2D4   | Calcium channel, voltage-dependent, alpha 2/delta subunit 4                 |
| NM_004580    | Hs.298651 | 5873   | RAB27A     | RAB27A, member RAS oncogene family                                          |
| NM_080423    | Hs.123352 | 5771   | PTPN2      | Protein tyrosine phosphatase, non-receptor type 2                           |
| NM_000594    | Hs.241570 | 7124   | TNF        | Tumor necrosis factor (TNF superfamily, member 2)                           |
| NM_002558    | Hs.41735  | 5023   | P2RX1      | Purinergic receptor P2X, ligand-gated ion channel, 1                        |
| NM_001462    | Hs.99855  | 2358   | FPRL1      | Formyl peptide receptor-like 1                                              |
| NM_005204    | Hs.432453 | 1326   | MAP3K8     | Mitogen-activated protein kinase kinase kinase 8                            |
| NM_060668    | Hs.366986 | 10333  | TLR6       | Toll-like receptor 6                                                        |
| NM_138554    | Hs.174312 | 7099   | TLR4       | Toll-like receptor 4                                                        |
| NM_207511    | Hs.522509 | 401563 | FLJ36268   | FLJ36268 protein                                                            |
| AK095499     | Hs.405994 | 284759 | PTPN1L3    | Protein tyrosine phosphatase, non-receptor type substrate 1-like 3          |
